# Supplementary material
Source: PubMed Central journal article supplement (PMC8028378)
Supplement: BPA-29-380-s001.pdf [file BPA-29-380-s001.pdf]

| <b>Secondary antibody</b>   | <b>Clone</b> | <b>Company</b>    | <b>Concentration</b> |
|-----------------------------|--------------|-------------------|----------------------|
| donkey anti-rabbit-biotin   | Polyclonal   | Dianova GmbH      | 1:1000               |
| donkey anti-goat-biotin     | Polyclonal   | Dianova GmbH      | 1:1000               |
| donkey anti-rat-Alexa488    | Polyclonal   | Life Technologies | 1:1000               |
| donkey anti-mouse-Alexa488  | Polyclonal   | Life Technologies | 1:1000               |
| donkey anti-rabbit-Alexa488 | Polyclonal   | Life Technologies | 1:1000               |
| donkey anti-mouse-Alexa568  | Polyclonal   | Life Technologies | 1:1000               |
| donkey anti-goat-Alexa568   | Polyclonal   | Life Technologies | 1:1000               |
| donkey anti-rat-Alexa647    | Polyclonal   | Dianova GmbH      | 1:1000               |
| donkey anti-rabbit-Alexa647 | Polyclonal   | Dianova GmbH      | 1:1000               |
