# Supplementary material
Source: PubMed Central journal article supplement (PMC8028378)
Supplement: BPA-29-380-s002.pdf [file BPA-29-380-s002.pdf]

| <b>Primary antibody</b>         | <b>Clone</b> | <b>Company</b>       | <b>Concentration</b> |
|---------------------------------|--------------|----------------------|----------------------|
| rabbit anti-human $\alpha$ -syn | 5G4          | Analytik Jena AG)    | 1:500                |
| mouse anti-human CD68           | PG-M1        | Dako GmbH            | 1:100                |
| mouse anti-CNPase               | SMI91        | BioLegend            | 1:1000               |
| mouse anti-KI67                 | MIB-1        | Dako GmbH            | 1:100                |
| mouse anti-GFAP                 | 6F2          | Dako GmbH            | 1:100                |
| rat anti-human $\alpha$ -syn    | 15G7         | Enzo Life sciences   | 1:200                |
| rabbit anti-OLIG2               | polyclonal   | Millipore            | 1:500                |
| rabbit anti-IBA1                | polyclonal   | Wako                 | 1:500                |
| mouse anti-PCNA                 | PC10         | Santa Cruz           | 1:1000               |
| rat anti-mouse CD68             | FA-11        | Bio-Rad Laboratories | 1:200                |
| goat anti-GFAP                  | C-19         | Santa Cruz           | 1:1000               |
