# Supplementary material
Source: PubMed Central journal article supplement (PMC8028378)
Supplement: BPA-29-380-s003.pdf [file BPA-29-380-s003.pdf]

| <b>Diagnosis</b> | <b>Gender</b> | <b>Age<br/>[yrs]</b> | <b><i>Post-mortem</i> delay<br/>[min]</b> | <b>Disease duration<br/>[months]</b> | <b>Brain weight [g]</b> | <b>Cause of death</b> |
|------------------|---------------|----------------------|-------------------------------------------|--------------------------------------|-------------------------|-----------------------|
| Control          | M             | 51                   | 465                                       | -                                    | 1450                    | Suicide               |
| Control          | M             | 55                   | 435                                       | -                                    | 1393                    | Intestinal ischemia   |
| Control          | F             | 60                   | 450                                       | -                                    | 1240                    | Septic shock          |
| Control          | F             | 64                   | 340                                       | -                                    | 1221                    | Respiratory failure   |
| Control          | F             | 77                   | 340                                       | -                                    | 1111                    | Respiratory failure   |
|                  | 2M/3F         | 61 ± 10              | 406 ± 61                                  | -                                    | 1283 ± 137              |                       |
| MSA-P            | M             | 55                   | 520                                       | 39                                   | 1380                    | Pneumonia             |
| MSA-P            | M             | 67                   | 370                                       | 58                                   | 1376                    | Pneumonia             |
| MSA-P            | F             | 66                   | 485                                       | 67                                   | 1005                    | Septic shock          |
| MSA-P            | F             | 59                   | 400                                       | 53                                   | 1102                    | Euthanasia            |
| MSA-P            | F             | 67                   | 435                                       | 96                                   | 1244                    | Respiratory failure   |
|                  | 2M/3F         | 63 ± 6               | 442 ± 61                                  | 63 ± 21                              | 1221 ± 166              |                       |
